# Supplementary material for: Preparation of a hyperbranched porous polymer and its sensing performance for nitroaromatics
Source: Royal Society of Chemistry journal article supplement (doi:10.1039/c8nj01881b), 2018-01-01
Supplement: c8nj01881b1.pdf [file c8nj01881b1.pdf]

## SUPPORTING INFORMATION

### Preparation of a hyperbranched porous polymer and its sensing performance for nitroaromatics

Hongtao Wu, He Xu, , Furong Tao, Xi Su, William W. Yu, Tianduo Li, Yuezhi Cui\*

Shandong Provincial Key Laboratory of Fine Chemicals, Qilu University of  
Technology (Shandong Academy of Sciences), Jinan 250353, P.R. China.

Tel: +86 531 89631208; Fax: +86 531 89631760;

E-mail address: [yuezhicui@163.com](mailto:yuezhicui@163.com)

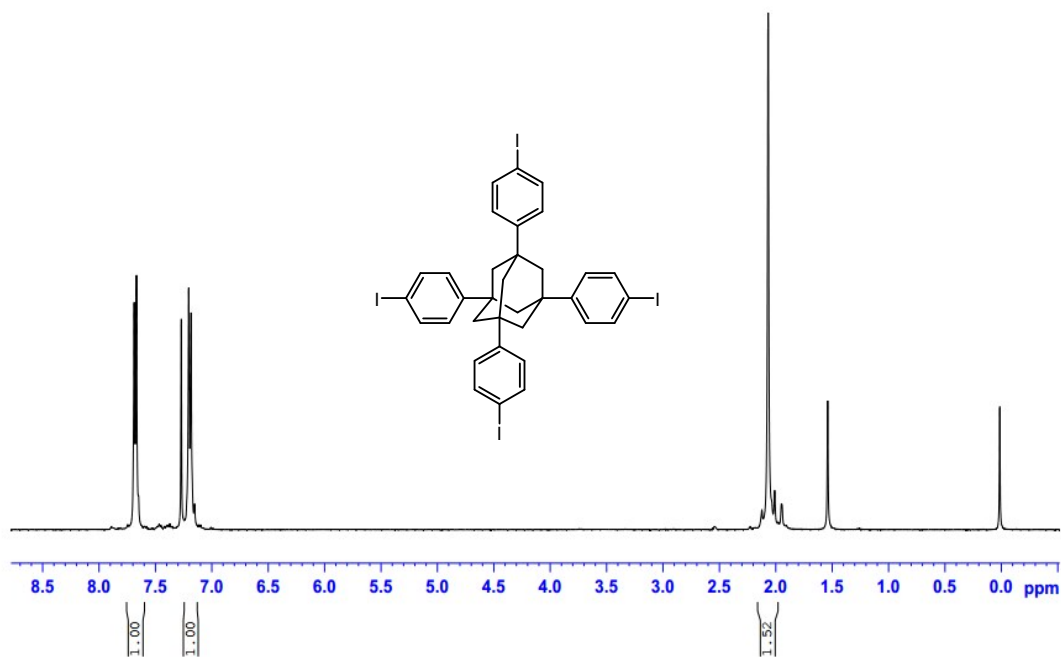

**Figure S1** <sup>1</sup>H NMR spectrum of 1,3,5,7-Tetrakis(4-iodophenyl)adamantane.

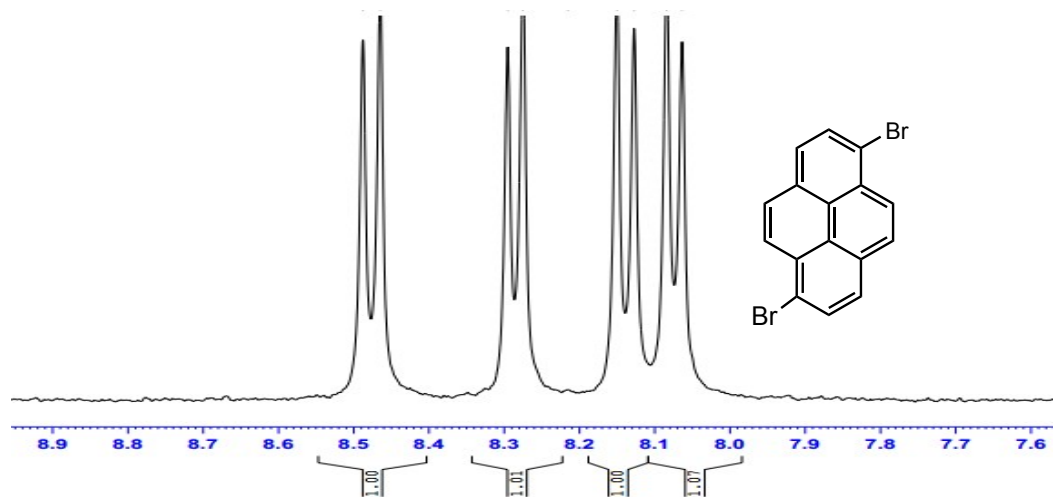

**Figure S2**  $^1\text{H}$  NMR spectrum of 1, 6-dibromopyrenes.

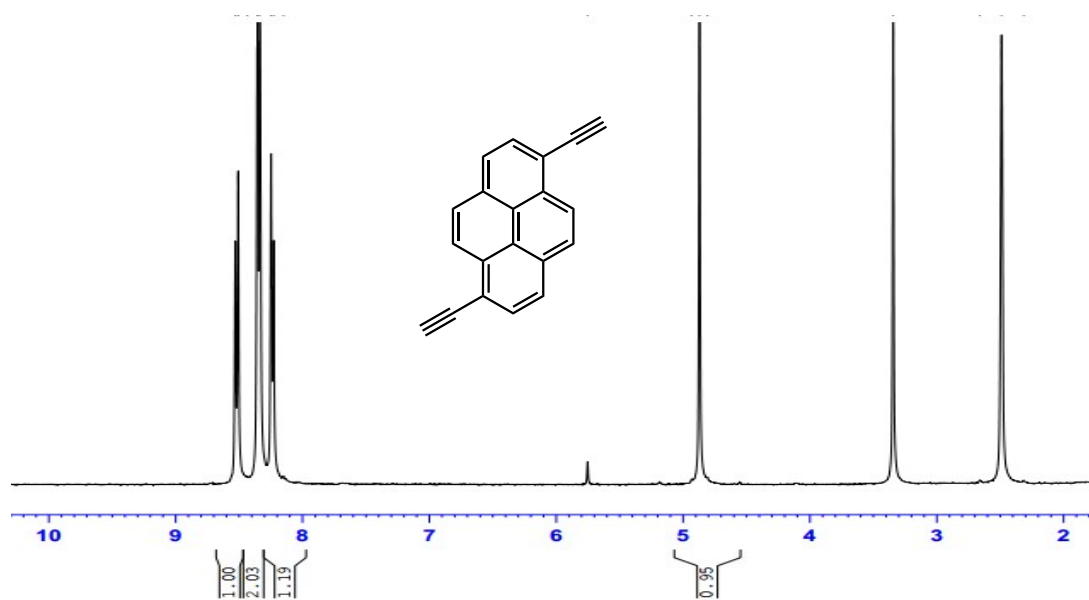

**Figure S3**  $^1\text{H}$  NMR spectrum of 1,6-diethynylpyrenes.

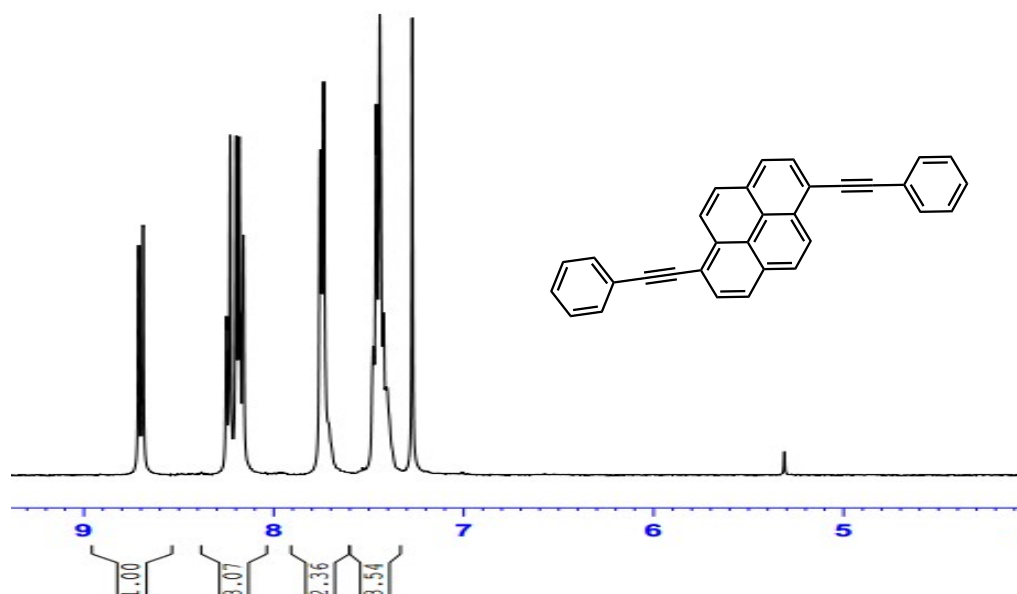

**Figure S4**  $^1\text{H}$  NMR spectrum of Comonomer M.

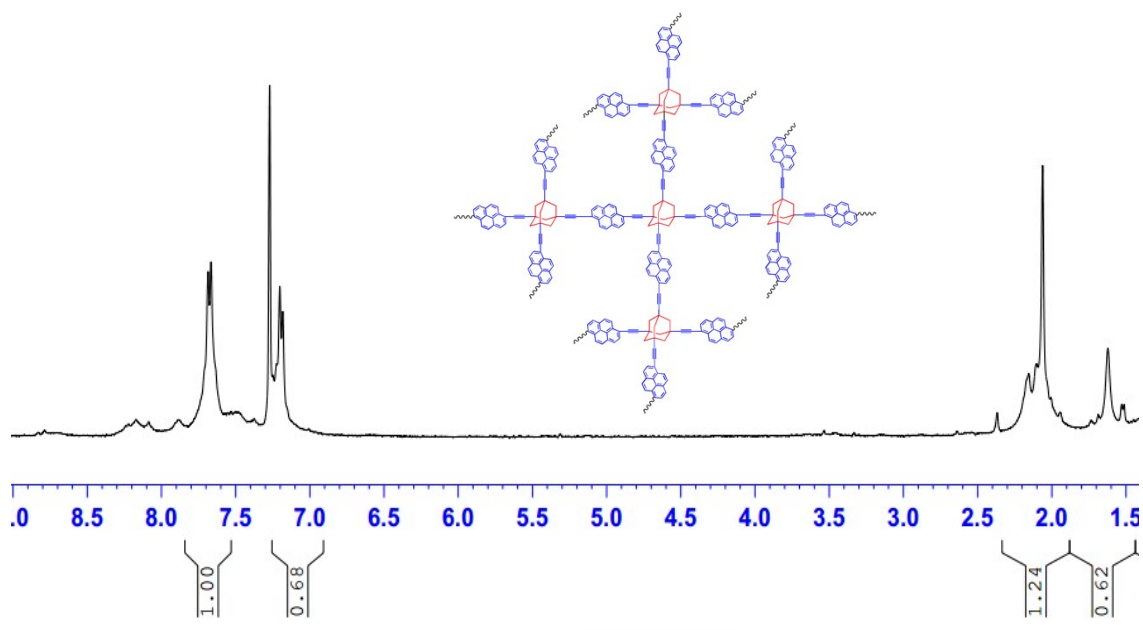

**Figure S5**  $^1\text{H}$  NMR spectrum of polymer P

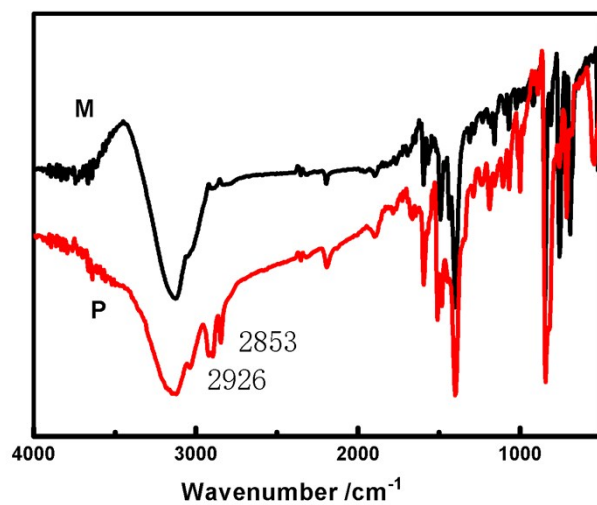

**Figure S6** The FTIR spectrum (KBr) of polymer P and comonomer M.

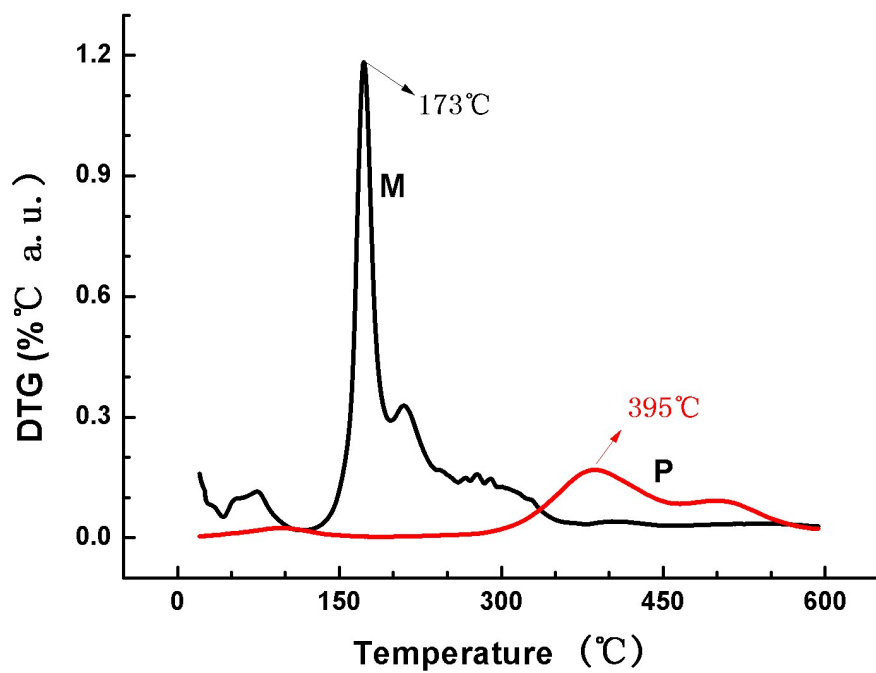

**Figure S7** The T<sub>m</sub> of P and M.
